# Supplementary material for: Gene Expression Microarray Data Meta-Analysis Identifies Candidate Genes and Molecular Mechanism Associated with Clear Cell Renal Cell Carcinoma
Source: PubMed Central journal article supplement (PMC6947001; doi:10.22074/cellj.2020.6561), 2019-12-15
Supplement: Cell-J-22-386-s01.pdf [file Cell-J-22-386-s01.pdf]

## Supplementary Information for

# Gene Expression Microarray Data Meta-Analysis Identifies Candidate Genes and Molecular Mechanism Associated with Clear Cell renal Cell Carcinoma

Ying Wang, Ph.D.<sup>1#\*</sup>, Haibin Wei, M.Sc.<sup>2#</sup>, Lizhi Song, M.Sc.<sup>1</sup>, Lu Xu, M.Sc.<sup>1</sup>, Jingyao Bao, B.Sc.<sup>1</sup>, Jiang Liu, Ph.D.<sup>1\*</sup>

1. Institute of Aging Research, School of Medicine, Hangzhou Normal University, Hangzhou, Zhejiang, China  
2. Department of Pathology, Zhejiang Cancer Hospital, Hangzhou, Zhejiang, China

#The first two authors equally contributed to this work.

\*Corresponding Address: Institute of Aging Research, School of Medicine, Hangzhou Normal University, Hangzhou, Zhejiang, China  
Emails: [flashingdancer@163.com](mailto:flashingdancer@163.com), [Jennings\\_L143@126.com](mailto:Jennings_L143@126.com)

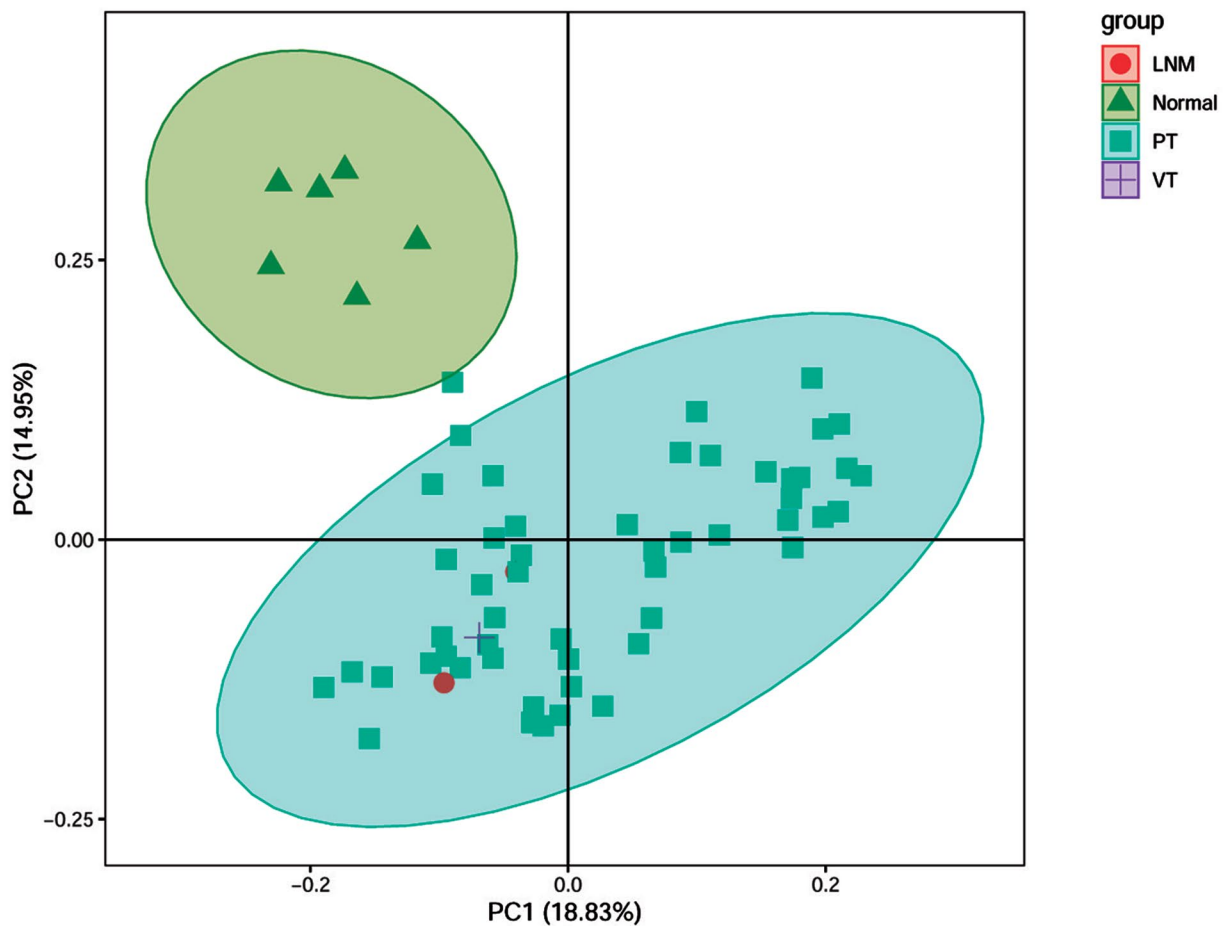

**Fig.S1:** Principal component analysis for 56 clear cell renal cell carcinoma tissue samples and 6 normal tissue samples. LNM; Lymph node metastasis, VT; Venous thrombus metastasis, PT; Primary tumor.

**Table S1:** The samples selected from GSE781

| Accession | Sample                                | Age (Y) | Gender | Kidney | Grade | Capsule penetration | Sinus invasion |
|-----------|---------------------------------------|---------|--------|--------|-------|---------------------|----------------|
| GSM11805  | N035 normal human kidney U133A        | 70      | F      | right  | III   | +                   | -              |
| GSM11814  | C035 renal clear cell carcinoma U133A | 70      | F      | right  | III   | +                   | -              |
| GSM11823  | N023 normal human kidney U133A        | 72      | F      | right  | I     | +                   | -              |
| GSM11830  | C023 renal clear cell carcinoma U133A | 72      | F      | right  | I     | +                   | -              |
| GSM12067  | C001 renal clear cell carcinoma U133A | 58      | M      | left   | I     | +                   | -              |
| GSM12075  | N001 normal human kidney U133A        | 58      | M      | left   | I     | +                   | -              |
| GSM12079  | C005 renal clear cell carcinoma U133A | 64      | M      | right  | I     | -                   | -              |
| GSM12098  | N005 normal human kidney U133A        | 64      | M      | right  | I     | -                   | -              |
| GSM12100  | C011 renal clear cell carcinoma U133A | 55      | M      | left   | III   | +                   | -              |
| GSM12105  | C032 renal clear cell carcinoma U133A | 65      | F      | right  | III   | +                   | +              |
| GSM12268  | N1 normal human kidney U133A          | 51      | M      | left   | III   | -                   | +              |
| GSM12270  | C2 renal clear cell carcinoma U133A   | 67      | M      | right  | II    | -                   | +              |
| GSM12283  | N2 renal clear cell carcinoma U133A   | 67      | M      | right  | II    | -                   | +              |
| GSM12298  | C3 renal clear cell carcinoma U133A   | 50      | M      | left   | II    | -                   | -              |
| GSM12300  | N3 renal clear cell carcinoma U133A   | 50      | M      | left   | II    | -                   | -              |
| GSM12399  | C4 renal clear cell carcinoma U133A   | 65      | M      | left   | I     | +                   | -              |
| GSM12444  | N4 renal clear cell carcinoma U133A   | 65      | M      | left   | I     | +                   | -              |

F; Female and M; Male.

**Table S2:** The samples selected from GSE6344

| Accession | Sample | Type   | Stage | Genechips |
|-----------|--------|--------|-------|-----------|
| GSM146778 | PT#2   | Normal | I     | HG-U133A  |
| GSM146779 | PT#2   | Tumor  | I     | HG-U134A  |
| GSM146780 | PT#3   | Normal | I     | HG-U135A  |
| GSM146781 | PT#3   | Tumor  | I     | HG-U136A  |
| GSM146782 | PT#4   | Normal | I     | HG-U137A  |
| GSM146783 | PT#4   | Tumor  | I     | HG-U138A  |
| GSM146784 | PT#5   | Normal | I     | HG-U139A  |
| GSM146785 | PT#5   | Tumor  | I     | HG-U140A  |
| GSM146786 | PT#6   | Normal | I     | HG-U141A  |
| GSM146787 | PT#6   | Tumor  | I     | HG-U142A  |
| GSM146788 | PT#8   | Tumor  | II    | HG-U143A  |
| GSM146789 | PT#8   | Normal | II    | HG-U144A  |
| GSM146790 | PT#9   | Normal | II    | HG-U145A  |
| GSM146791 | PT#9   | Tumor  | II    | HG-U146A  |
| GSM146792 | PT#10  | Normal | II    | HG-U147A  |
| GSM146793 | PT#10  | Tumor  | II    | HG-U148A  |
| GSM146794 | PT#11  | Normal | II    | HG-U149A  |
| GSM146795 | PT#11  | Tumor  | II    | HG-U150A  |
| GSM146796 | PT#12  | Normal | II    | HG-U151A  |
| GSM146797 | PT#12  | Tumor  | II    | HG-U152A  |

**Table S3:** The samples selected from GSE53000

| <b>Accession</b> | <b>Sample</b> | <b>Type</b>           | <b>Tissue</b>                                         | <b>Age (Y)</b> | <b>Sex</b> |
|------------------|---------------|-----------------------|-------------------------------------------------------|----------------|------------|
| GSM1279951       | EV002         | Normal kidney         | Normal adult kidney                                   | 59             | M          |
| GSM1279952       | EV003         | Normal kidney         | Normal adult kidney                                   | 64             | F          |
| GSM1279953       | EV005         | Normal kidney         | Normal adult kidney                                   | 79             | F          |
| GSM1279954       | EV007         | Normal kidney         | Normal adult kidney                                   | 59             | F          |
| GSM1279955       | RMH002        | Normal kidney         | Normal adult kidney                                   | 63             | M          |
| GSM1279956       | RMH008        | Normal kidney         | Normal adult kidney                                   | 63             | M          |
| GSM1279957       | EV002         | Primary tumor region  | Clear cell renal cell carcinoma                       | 59             | M          |
| GSM1279959       | EV002         | Primary tumor region  | Clear cell renal cell carcinoma                       | 59             | M          |
| GSM1279960       | EV002         | Primary tumor region  | Clear cell renal cell carcinoma                       | 59             | M          |
| GSM1279962       | EV002         | Primary tumor region  | Clear cell renal cell carcinoma                       | 59             | M          |
| GSM1279963       | EV002         | Primary tumor region  | Clear cell renal cell carcinoma                       | 59             | M          |
| GSM1279964       | EV003         | Primary tumor region  | Clear cell renal cell carcinoma                       | 64             | F          |
| GSM1279965       | EV003         | Primary tumor region  | Clear cell renal cell carcinoma                       | 64             | F          |
| GSM1279966       | EV003         | Primary tumor region  | Clear cell renal cell carcinoma                       | 64             | F          |
| GSM1279967       | EV003         | Primary tumor region  | Clear cell renal cell carcinoma                       | 64             | F          |
| GSM1279968       | EV003         | Primary tumor region  | Clear cell renal cell carcinoma                       | 64             | F          |
| GSM1279969       | EV005         | Primary tumor region  | Clear cell renal cell carcinoma                       | 79             | F          |
| GSM1279970       | EV005         | Primary tumor region  | Clear cell renal cell carcinoma                       | 79             | F          |
| GSM1279971       | EV005         | Primary tumor region  | Clear cell renal cell carcinoma                       | 79             | F          |
| GSM1279972       | EV005         | Primary tumor region  | Clear cell renal cell carcinoma                       | 79             | F          |
| GSM1279973       | EV005         | Primary tumor region  | Clear cell renal cell carcinoma                       | 79             | F          |
| GSM1279974       | EV005         | Primary tumor region  | Clear cell renal cell carcinoma                       | 79             | F          |
| GSM1279975       | EV005         | Primary tumor region  | Clear cell renal cell carcinoma                       | 79             | F          |
| GSM1279976       | EV006         | Primary tumor region  | Clear cell renal cell carcinoma                       | 65             | M          |
| GSM1279977       | EV006         | Primary tumor region  | Clear cell renal cell carcinoma                       | 65             | M          |
| GSM1279978       | EV006         | Primary tumor region  | Clear cell renal cell carcinoma                       | 65             | M          |
| GSM1279979       | EV006         | Primary tumor region  | Clear cell renal cell carcinoma                       | 65             | M          |
| GSM1279980       | EV006         | Primary tumor region  | Clear cell renal cell carcinoma                       | 65             | M          |
| GSM1279982       | EV006         | Primary tumor region  | Clear cell renal cell carcinoma lymph node metastasis | 65             | M          |
| GSM1279983       | EV006         | Lymph node metastasis | Clear cell renal cell carcinoma lymph node metastasis | 65             | M          |
| GSM1279984       | EV006         | Lymph node metastasis | Clear cell renal cell carcinoma                       | 65             | M          |
| GSM1279985       | EV007         | Primary tumor region  | Clear cell renal cell carcinoma                       | 59             | F          |
| GSM1279986       | EV007         | Primary tumor region  | Clear cell renal cell carcinoma                       | 59             | F          |

Table S3: Continued

| Accession  | Sample | Type                 | Tissue                                          | Age (Y) | Sex |
|------------|--------|----------------------|-------------------------------------------------|---------|-----|
| GSM1279987 | EV007  | Primary tumor region | Clear cell renal cell carcinoma                 | 59      | F   |
| GSM1279988 | EV007  | Primary tumor region | Clear cell renal cell carcinoma                 | 59      | F   |
| GSM1279989 | EV007  | Primary tumor region | Clear cell renal cell carcinoma                 | 59      | F   |
| GSM1279990 | EV007  | Primary tumor region | Clear cell renal cell carcinoma                 | 59      | F   |
| GSM1279991 | EV007  | Primary tumor region | Clear cell renal cell carcinoma                 | 59      | F   |
| GSM1279992 | RK26   | Primary tumor region | Clear cell renal cell carcinoma                 | 47      | M   |
| GSM1279993 | RK26   | Primary tumor region | Clear cell renal cell carcinoma                 | 47      | M   |
| GSM1279994 | RK26   | Primary tumor region | Clear cell renal cell carcinoma                 | 47      | M   |
| GSM1279995 | RK26   | Primary tumor region | Clear cell renal cell carcinoma                 | 47      | M   |
| GSM1279996 | RK26   | Primary tumor region | Clear cell renal cell carcinoma                 | 47      | M   |
| GSM1279997 | RK26   | Primary tumor region | Clear cell renal cell carcinoma                 | 47      | M   |
| GSM1279998 | RK26   | Primary tumor region | Clear cell renal cell carcinoma                 | 47      | M   |
| GSM1279999 | RK26   | Primary tumor region | Clear cell renal cell carcinoma                 | 47      | M   |
| GSM1280000 | RK26   | Primary tumor region | Clear cell renal cell carcinoma                 | 47      | M   |
| GSM1280001 | RMH002 | Primary tumor region | Clear cell renal cell carcinoma                 | 63      | M   |
| GSM1280002 | RMH002 | Primary tumor region | Clear cell renal cell carcinoma                 | 63      | M   |
| GSM1280003 | RMH002 | Primary tumor region | Clear cell renal cell carcinoma                 | 63      | M   |
| GSM1280004 | RMH002 | Primary tumor region | Clear cell renal cell carcinoma                 | 63      | M   |
| GSM1280005 | RMH004 | Primary tumor region | Clear cell renal cell carcinoma                 | 61      | M   |
| GSM1280006 | RMH004 | Primary tumor region | Clear cell renal cell carcinoma                 | 61      | M   |
| GSM1280007 | RMH004 | Primary tumor region | Clear cell renal cell carcinoma                 | 61      | M   |
| GSM1280010 | RMH004 | Primary tumor region | Clear cell renal cell carcinoma                 | 61      | M   |
| GSM1280012 | RMH004 | Venous thrombus      | Clear cell renal cell carcinoma venous thrombus | 61      | M   |
| GSM1280013 | RMH008 | Primary tumor region | Clear cell renal cell carcinoma                 | 63      | M   |
| GSM1280014 | RMH008 | Primary tumor region | Clear cell renal cell carcinoma                 | 63      | M   |
| GSM1280015 | RMH008 | Primary tumor region | Clear cell renal cell carcinoma                 | 63      | M   |
| GSM1280016 | RMH008 | Primary tumor region | Clear cell renal cell carcinoma                 | 63      | M   |
| GSM1280017 | RMH008 | Primary tumor region | Clear cell renal cell carcinoma                 | 63      | M   |
| GSM1280018 | RMH008 | Primary tumor region | Clear cell renal cell carcinoma                 | 63      | M   |

F; Female and M; Male.
